# Supplementary material
Source: PubMed Central journal article supplement (PMC4996441)
Supplement: supp_2015-0323_Supplemental_Table.pdf [file supp_2015-0323_Supplemental_Table.pdf]

**Supplemental Table – Baik et al.**

**Table S1 Laennec scoring system for staging fibrosis in liver specimens**

| Stage | Name                                  | Septa (thickness and number) | Criteria                                                                                                              | Score |
|-------|---------------------------------------|------------------------------|-----------------------------------------------------------------------------------------------------------------------|-------|
| 0     | No definite fibrosis                  |                              |                                                                                                                       | 0     |
| 1     | Minimal fibrosis                      | +/-                          | No septa or rare thin septum; may have portal expansion or mild sinusoidal fibrosis                                   | 1     |
| 2     | Mild fibrosis                         | +                            | Occasional thin septa; may have portal expansion or mild sinusoidal fibrosis                                          | 2     |
| 3     | Moderate fibrosis                     | ++                           | Moderate thin septa; up to incomplete cirrhosis                                                                       | 3     |
| 4A    | Mild, definite, or probable cirrhosis | +++                          | Marked septation with rounded contours or visible nodules. Most septa are thin (one broad septum allowed)             | 4     |
| 4B    | Moderate cirrhosis                    | ++++                         | At least two broad septa, but not very broad septa and less than half of biopsy length composed of minute nodules     | 5     |
| 4C    | Severe cirrhosis                      | +++++                        | At least one very broad septum or more than half of biopsy length composed of minute nodules (micronodular cirrhosis) | 6     |
